# Supplementary material for: Synthesis, Structure and Bonding in Pentagonal Bipyramidal Cluster Compounds Containing a cyclo-Sn5 Ring, [(CO)3MSn5M(CO)3]4− (M = Cr, Mo)
Source: MDPI journal article supplement (doi:10.3390/inorganics10060075), 2022-05-30
Supplement: s1 [file s1]

**Synthesis, Structure and Bonding in Pentagonal Bipyramidal Cluster Compounds Containing a *cyclo*-Sn<sub>5</sub> Ring, [(CO)<sub>3</sub>MSn<sub>5</sub>M(CO)<sub>3</sub>]<sup>4-</sup> (M = Cr, Mo).**

Sourav Mondal,<sup>[a]</sup> Wei-Xing Chen,<sup>[b]</sup> Zhong-Ming Sun,<sup>\*[b]</sup> and John E. McGrady<sup>\*[a]</sup>

[a] Department of Chemistry, University of Oxford, Oxford, OX1 3QZ, UK; E-mail: john.mcgrady@chem.ox.ac.uk

[b] State Key Laboratory of Elemento-Organic Chemistry, Tianjin Key Lab of Rare Earth Materials and Applications, School of Materials Science and Engineering, Nankai University, Tianjin 300350, China; E-mail: sunlab@nankai.edu.cn

**Table of Contents**

**Section S1: Supplementary Crystallographic information**

**Section S2: Supplementary ESI-MS Data**

**Section S3: Energy Dispersive X-ray (EDX) Spectroscopic Analysis**

**Section S4: Quantum Chemical Analysis**

## Section S1: Supplementary Crystallographic information

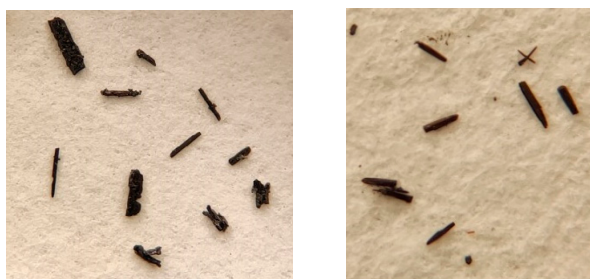

**Figure S1.** Crystals of  $K_2(en)_3[K([2.2.2]\text{-crypt})_2[Sn_5\{Cr(CO)_3\}_2]\cdot(en)_2$  (**1**, left) and  $K[K(18\text{-crown-6})]_3[Sn_5\{Mo(CO)_3\}_2]$  (**2**, right) scattered on the filter paper, respectively.

**Table S1.** X-ray measurements and structure solution of  $K_2(en)_3[K([2.2.2]\text{-crypt})_2[Sn_5\{Cr(CO)_3\}_2]\cdot(en)_2$  (**1**) and  $K[K(18\text{-crown-6})]_3[Sn_5\{Mo(CO)_3\}_2]$  (**2**)

| Compound                                      | <b>1</b>                               | <b>2</b>                         |
|-----------------------------------------------|----------------------------------------|----------------------------------|
| CCDC number                                   | 2122111                                | 2122112                          |
| Empirical formula                             | $C_{51}H_{106}N_{13}O_{18}K_4Cr_2Sn_5$ | $C_{42}H_{72}O_{24}K_4Mo_2Sn_5$  |
| Formula weight                                | 2043.33                                | 1902.72                          |
| Temperature/K                                 | 100.01(10)                             | 100.00(10)                       |
| Crystal system                                | triclinic                              | monoclinic                       |
| Space group                                   | $P\bar{1}$                             | $P2_1/c$                         |
| $a/\text{\AA}$                                | 16.0613(2)                             | 24.1911(2)                       |
| $b/\text{\AA}$                                | 16.5096(2)                             | 15.80710(10)                     |
| $c/\text{\AA}$                                | 18.0141(2)                             | 20.20680(10)                     |
| $\alpha/^\circ$                               | 107.1010(10)                           | 90                               |
| $\beta/^\circ$                                | 93.6440(10)                            | 102.4720(10)                     |
| $\gamma/^\circ$                               | 112.5370(10)                           | 90                               |
| Volume/ $\text{\AA}^3$                        | 4131.96(9)                             | 7544.56(9)                       |
| Z                                             | 2                                      | 4                                |
| $\rho_{\text{calc}}/\text{g cm}^{-3}$         | 1.642                                  | 1.675                            |
| $\mu/\text{mm}^{-1}$                          | 16.243                                 | 18.075                           |
| $F(000)$                                      | 2042                                   | 3704                             |
| $2\theta$ range for data collection/ $^\circ$ | 7.83 to 133.984                        | 7.166 to 133.99                  |
| Reflections collected                         | 41350                                  | 46710                            |
| Data/restraints/parameters                    | 14688/3105/885                         | 13436/0/694                      |
| Goodness-of-fit on $F^2$                      | 1.031                                  | 1.045                            |
| Final $R$ indexes [ $I \geq 2\sigma(I)$ ]     | $R_1 = 0.0552$ , $wR_2 = 0.1407$       | $R_1 = 0.0414$ , $wR_2 = 0.1147$ |
| Final $R$ indexes [all data]                  | $R_1 = 0.0583$ , $wR_2 = 0.1429$       | $R_1 = 0.0459$ , $wR_2 = 0.1175$ |
| Largest diff. peak/hole / $e \text{\AA}^{-3}$ | 2.00/-2.57                             | 2.13/-1.21                       |

# SUPPORTING INFORMATION

$$^a R_1 = \sum ||F_o| - |F_c|| / \sum |F_o|; wR_2 = \{ \sum w[(F_o)^2 - (F_c)^2]^2 / \sum w[(F_o)^2]^2 \}^{1/2}$$

$$^b \text{GooF} = \{ \sum w[(F_o)^2 - (F_c)^2]^2 / (n-p) \}^{1/2}$$

**Table S2.** Geometrical parameters including bond lengths [Å] and angles [°] for [Sn<sub>5</sub>{M(CO)<sub>3</sub>}<sub>2</sub>]<sup>4-</sup> cluster anions and Sn<sub>5</sub>-containing anions in known Zintl phases Na<sub>8</sub>BaSn<sub>6</sub> and Na<sub>8</sub>EuSn<sub>6</sub>.

| Types            | bond     | 1-Cr       | 2-Mo        | Na <sub>8</sub> EuSn <sub>6</sub> | Na <sub>8</sub> BaSn <sub>6</sub> |
|------------------|----------|------------|-------------|-----------------------------------|-----------------------------------|
| Distances<br>(Å) | Sn1-Sn2  | 2.892(3)   | 2.9382(5)   | 2.876(2)                          | 2.911(1)                          |
|                  | Sn2-Sn3  | 2.899(3)   | 2.9202(5)   | 2.894(2)                          | 2.939(1)                          |
|                  | Sn3-Sn4  | 2.872(4)   | 2.9225(4)   | 2.864(2)                          | 2.894(1)                          |
|                  | Sn4-Sn5  | 2.909(4)   | 2.9328(5)   | 2.878(2)                          | 2.915(1)                          |
|                  | Sn5-Sn1  | 2.744(3)   | 2.9542(5)   | 2.907(2)                          | 2.916(1)                          |
|                  | M1/2-Sn1 | 2.871(3)   | 2.9335(5)   | —                                 | —                                 |
|                  | M1/2-Sn2 | 2.863(3)   | 2.9602(5)   | —                                 | —                                 |
|                  | M1/2-Sn3 | 2.809(3)   | 2.9653(5)   | —                                 | —                                 |
|                  | M1/2-Sn4 | 2.841(4)   | 2.9314(5)   | —                                 | —                                 |
|                  | M1/2-Sn5 | 2.868(9)   | 2.9481(5)   | —                                 | —                                 |
| Angles<br>(°)    | Sn1-Sn2- | 106.43(11) | 107.974(13) | 108.37(7)                         | 108.74(5)                         |
|                  | Sn2-Sn3- | 108.35(14) | 107.917(13) | 107.91(7)                         | 107.73(5)                         |
|                  | Sn3-Sn4- | 106.81(15) | 108.970(13) | 108.32(7)                         | 108.28(5)                         |
|                  | Sn4-Sn5- | 108.86(9)  | 106.827(13) | 108.05(7)                         | 108.42(5)                         |
|                  | Sn5-Sn1- | 109.45(10) | 108.240(13) | 107.35(7)                         | 106.83(5)                         |

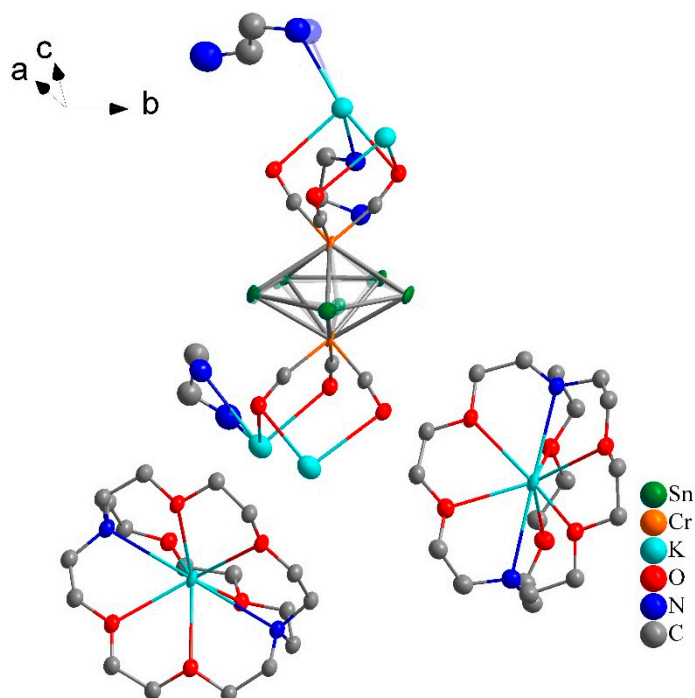

**Figure S2.** Asymmetric unit of **1** with the cluster fragment. Thermal ellipsoids are drawn at 50% probability. The second component of the disordered anion is shown as 50% transparent.

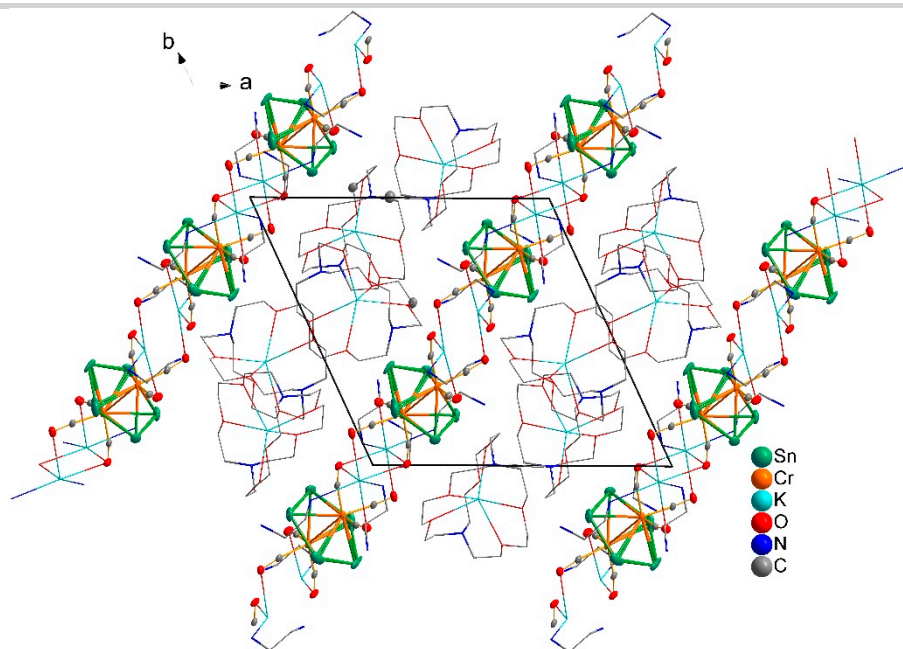

**Figure S3.** Unit cell of **1**. Thermal ellipsoids are drawn at 50% probability. Minor component in the cluster site are omitted for clarity.

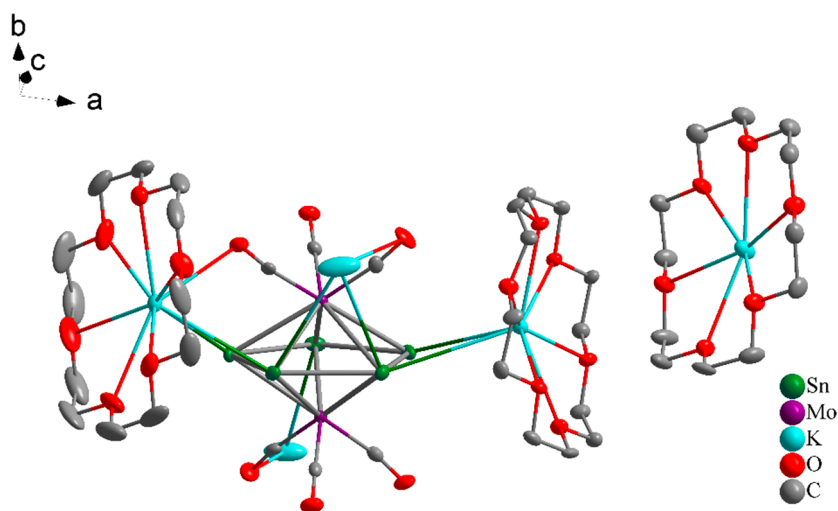

**Figure S4.** Asymmetric unit of **2** with the cluster fragment. Thermal ellipsoids are drawn at 50% probability.

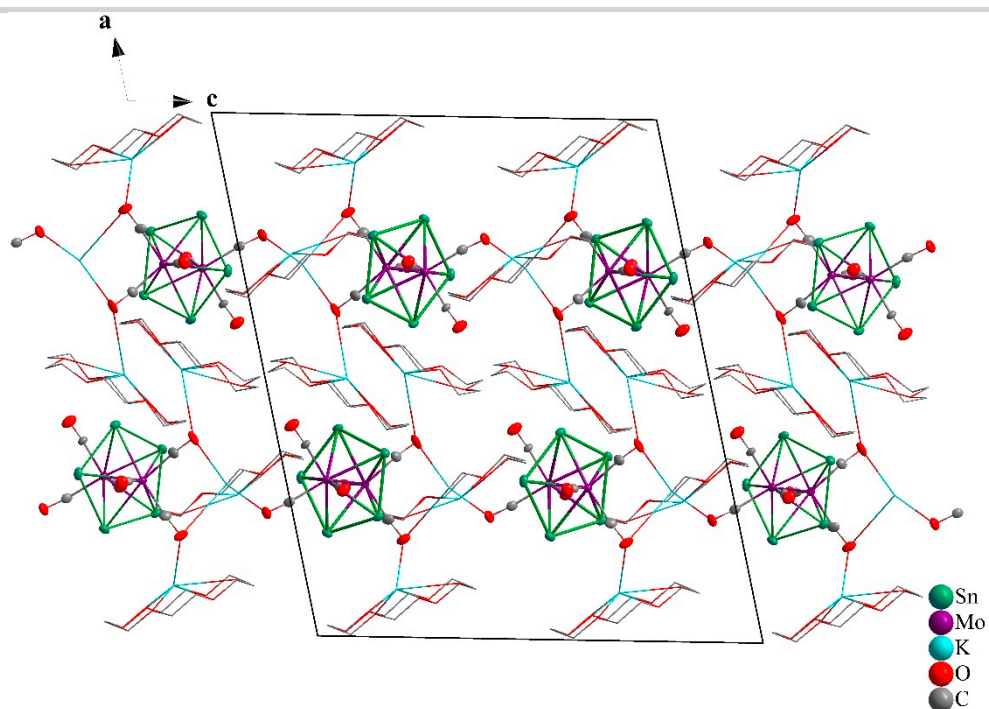

**Figure S5.** Unit cell of **2**. Thermal ellipsoids are drawn at 50% probability.

## Section S2: ESI-MS Studies

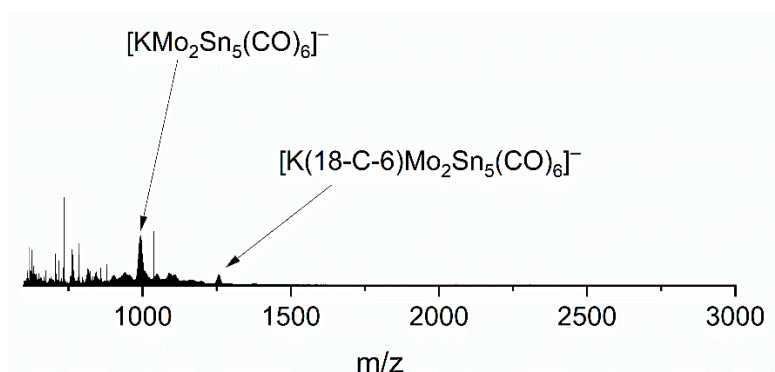

**Figure S6.** Overview ESI mass spectrum in negative ion mode of a freshly dissolved crystalline sample of **2** in MeCN.

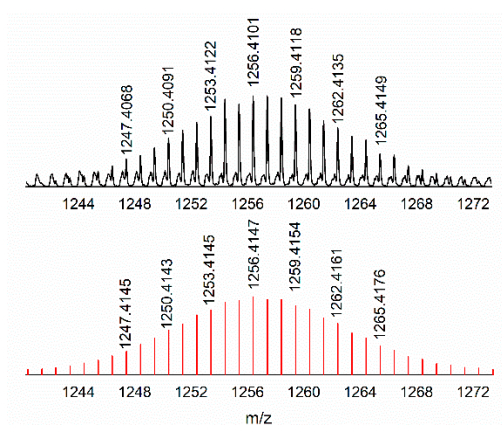

**Figure S7.** Measured (top) and simulated (bottom) spectrum of the fragment  $[\text{K}(18\text{-C-}6)\text{Mo}_2\text{Sn}_5(\text{CO})_6]^-$ .

### Section S3: Energy Dispersive X-ray (EDX) Spectroscopic Analysis

EDX analysis on **1** and **2** (Figures S12 and S13) was performed by a scanning electron microscope (FE-SEM, JEOL JSM-7800F, Japan). Data acquisition was performed with an acceleration voltage of 15 kV and an accumulation time of 60 s. Multiple crystals were used for EDX spectroscopic analysis, and data were recorded: different positions on one single crystal and different positions on other single crystals.

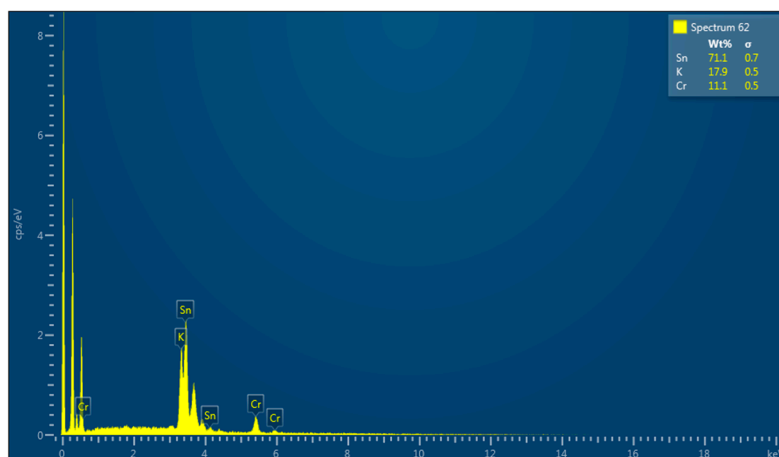

**Figure S8.** EDX analysis of **1**.

| Element | Line type | wt%  | $\sigma$ | Experimental / |
|---------|-----------|------|----------|----------------|
| K       | K series  | 17.9 | 0.5      | 3.8/4          |
| Cr      | L series  | 11.1 | 0.5      | 1.8/2          |
| Sn      | L series  | 71.1 | 0.7      | 5/5            |

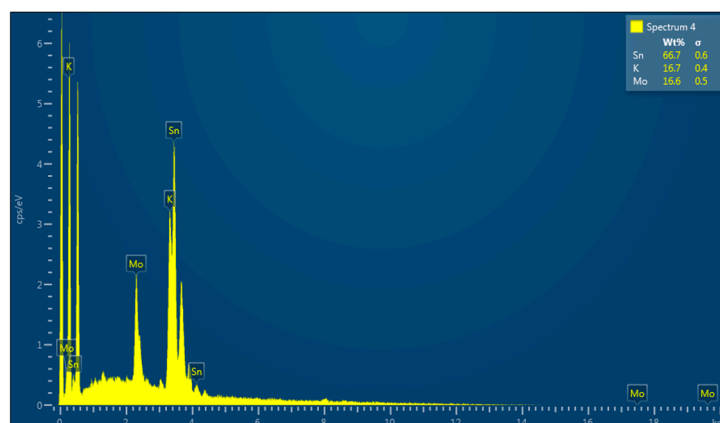

**Figure S9.** EDX analysis of **2**.

| Element | Line type | wt%  | $\sigma$ | Experimental / |
|---------|-----------|------|----------|----------------|
| K       | K series  | 16.7 | 0.4      | 4.1/4          |
| Mo      | L series  | 16.6 | 0.5      | 1.7/2          |
| Sn      | L series  | 66.7 | 0.6      | 5.4/5          |

# SUPPORTING INFORMATION

## Section S4: Quantum Chemical Analysis

All the calculations are performed as described in the experimental section. Optimised cartesian co-ordinates (in Å) for all reported complexes for PBE functionals are summarized below:

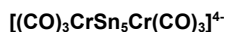

|    |              |              |             |
|----|--------------|--------------|-------------|
| Sn | 4.737018000  | 2.980643000  | 2.212367000 |
| Sn | 3.668424000  | -1.341625000 | 3.764593000 |
| Cr | 2.576263000  | 1.070303000  | 2.594900000 |
| Cr | 4.903195000  | 1.195278000  | 4.448793000 |
| O  | 1.749589000  | 2.892443000  | 0.366565000 |
| O  | 1.779630000  | -1.093420000 | 0.678749000 |
| O  | 5.629236000  | -0.612430000 | 6.727349000 |
| O  | 5.754723000  | 3.324244000  | 6.373840000 |
| O  | 7.836564000  | 1.264766000  | 3.839620000 |
| C  | 0.840485000  | 1.213713000  | 3.074688000 |
| C  | 2.192051000  | 2.234917000  | 1.267454000 |
| C  | 2.191761000  | -0.299196000 | 1.482605000 |
| C  | 5.246172000  | 0.034429000  | 5.788684000 |
| C  | 5.305636000  | 2.547212000  | 5.577181000 |
| C  | 6.642031000  | 1.210898000  | 3.959818000 |
| Sn | 5.172424000  | 0.136377000  | 1.752244000 |
| Sn | 2.851177000  | 3.258572000  | 4.423754000 |
| Sn | 2.279930000  | 0.585600000  | 5.450558000 |
| O  | -0.351712000 | 1.317783000  | 3.181456000 |

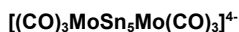

|    |             |              |              |
|----|-------------|--------------|--------------|
| Sn | 8.121766000 | 10.456199000 | 13.142953000 |
| Sn | 5.185549000 | 10.557560000 | 12.628846000 |
| Sn | 9.485306000 | 12.067251000 | 11.037825000 |
| Sn | 4.723426000 | 12.250861000 | 10.211485000 |
| Sn | 7.387155000 | 13.161850000 | 9.208703000  |
| Mo | 6.865327000 | 13.005689000 | 12.159844000 |
| Mo | 7.087693000 | 10.401720000 | 10.322907000 |
| O  | 4.440529000 | 13.875120000 | 13.954710000 |
| O  | 5.348481000 | 9.585341000  | 7.842802000  |
| O  | 8.825600000 | 13.893727000 | 14.446276000 |
| O  | 9.426085000 | 9.567251000  | 8.403426000  |
| O  | 6.890149000 | 7.410697000  | 11.259817000 |
| C  | 5.321445000 | 13.457325000 | 13.263978000 |
| C  | 8.598588000 | 9.953999000  | 9.172823000  |
| C  | 6.866900000 | 14.856789000 | 11.541972000 |
| C  | 8.125680000 | 13.477550000 | 13.570374000 |
| C  | 5.941136000 | 9.970122000  | 8.804972000  |
| C  | 6.956439000 | 8.573964000  | 10.988908000 |
| O  | 6.833290000 | 16.029264000 | 11.322160000 |

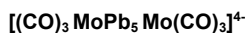

|    |              |              |              |
|----|--------------|--------------|--------------|
| Pb | 0.421489000  | 2.580258000  | 0.028521000  |
| Pb | -2.346011000 | 1.164861000  | -0.022120000 |
| Pb | -1.851777000 | -1.899092000 | 0.029705000  |
| Pb | 1.211059000  | -2.361378000 | -0.010907000 |
| Pb | 2.625755000  | 0.387455000  | -0.031437000 |
| Mo | 0.005719000  | -0.010836000 | -1.617028000 |
| Mo | 0.009182000  | -0.015933000 | 1.611290000  |
| C  | -1.508928000 | -0.542072000 | -2.717192000 |
| O  | -2.351286000 | -0.810167000 | -3.527877000 |
| C  | 1.276262000  | -0.971809000 | -2.734747000 |
| O  | 1.992166000  | -1.481437000 | -3.551328000 |
| C  | 0.232818000  | 1.541274000  | -2.768879000 |
| O  | 0.347540000  | 2.379250000  | -3.615971000 |
| C  | -1.392697000 | 0.671377000  | 2.771863000  |
| O  | -2.147173000 | 1.042983000  | 3.623453000  |
| C  | 0.068051000  | -1.603169000 | 2.735378000  |
| O  | 0.073431000  | -2.476774000 | 3.556937000  |



## SUPPORTING INFORMATION

---

|   |             |             |             |
|---|-------------|-------------|-------------|
| C | 1.314427000 | 0.931701000 | 2.699948000 |
| O | 2.019971000 | 1.473509000 | 3.505146000 |

### [CpCrP<sub>5</sub>CrCp]<sup>-</sup>

|    |              |              |              |
|----|--------------|--------------|--------------|
| Cr | 2.698406000  | 1.059899000  | 2.725138000  |
| Cr | 4.745163000  | 1.172807000  | 4.367939000  |
| P  | 4.240731000  | -0.681463000 | 3.020300000  |
| P  | 2.866328000  | -0.207143000 | 4.708973000  |
| P  | 4.904895000  | 1.336806000  | 2.059726000  |
| P  | 3.930365000  | 3.044076000  | 3.157044000  |
| P  | 2.665952000  | 2.099445000  | 4.789247000  |
| C  | 6.510525000  | 0.133320000  | 5.161951000  |
| C  | 6.925947000  | 1.360234000  | 4.560805000  |
| C  | 6.303208000  | 2.430774000  | 5.271460000  |
| C  | 5.501987000  | 1.867293000  | 6.310001000  |
| C  | 5.631316000  | 0.446765000  | 6.242505000  |
| H  | 6.808923000  | -0.863608000 | 4.850434000  |
| H  | 7.597970000  | 1.461797000  | 3.713473000  |
| H  | 6.414489000  | 3.489458000  | 5.054781000  |
| H  | 4.900598000  | 2.420823000  | 7.025469000  |
| H  | 5.141062000  | -0.270754000 | 6.894292000  |
| C  | 2.024893000  | 1.093163000  | 0.634383000  |
| C  | 1.396723000  | 2.163225000  | 1.340972000  |
| C  | 0.596668000  | 1.599017000  | 2.380163000  |
| C  | 0.728406000  | 0.178678000  | 2.313464000  |
| C  | 1.611035000  | -0.134173000 | 1.235752000  |
| H  | 2.698738000  | 1.195068000  | -0.211520000 |
| H  | 1.514162000  | 3.222304000  | 1.129732000  |
| H  | -0.006424000 | 2.152142000  | 3.094450000  |
| H  | 0.246377000  | -0.538758000 | 2.971439000  |
| H  | 1.914912000  | -1.130571000 | 0.927901000  |

### Ti<sub>7</sub><sup>7-</sup>

|    |              |              |              |
|----|--------------|--------------|--------------|
| Ti | -0.376180000 | 1.633978000  | -2.282422000 |
| Ti | 0.360685000  | -1.586372000 | -2.324641000 |
| Ti | 0.781438000  | -2.593996000 | 0.850333000  |
| Ti | -0.004273000 | -0.022027000 | 2.829864000  |
| Ti | -0.772621000 | 2.579006000  | 0.889767000  |
| Ti | -1.592381000 | -0.462413000 | 0.025215000  |
| Ti | 1.603332000  | 0.451825000  | 0.011885000  |

# SUPPORTING INFORMATION

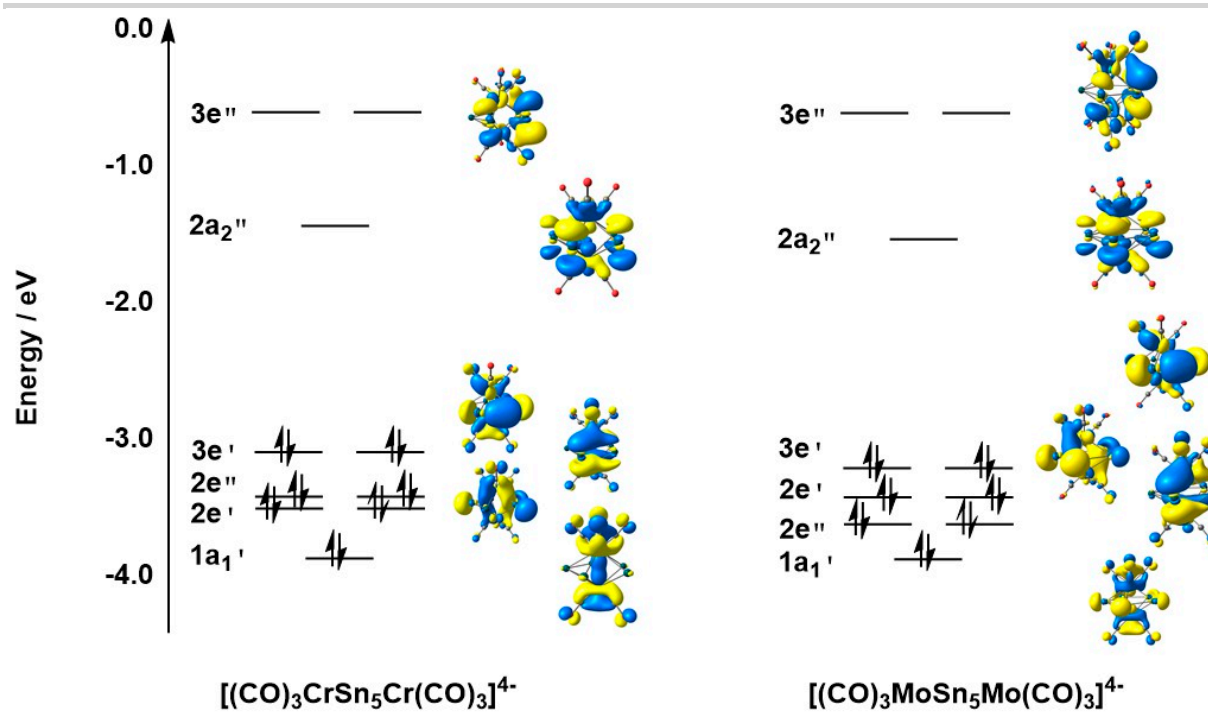

**Figure S10.** Kohn-Sham molecular orbital diagrams for  $[(\text{CO})_3\text{CrSn}_5\text{Cr}(\text{CO})_3]^{4-}$  and  $[(\text{CO})_3\text{MoSn}_5\text{Mo}(\text{CO})_3]^{4-}$ .
